# Supplementary material for: e-Estesia: A Serious Game for Reducing Arousal, Improving Emotional Regulation and Increasing Wellbeing in Individuals with Gambling Disorder
Source: MDPI journal article supplement (doi:10.3390/jcm11226798), 2022-11-17
Supplement: s1 [file s1]

# Supplementary Materials

**Table S1.** Descriptive for the sample.

|                                 | Total<br><i>n</i> = 104 |           | Control<br><i>n</i> = 64 |           | Experimental<br><i>n</i> = 40 |           | <i>p</i>        |
|---------------------------------|-------------------------|-----------|--------------------------|-----------|-------------------------------|-----------|-----------------|
|                                 | <i>n</i>                | %         | <i>n</i>                 | %         | <i>n</i>                      | %         |                 |
| Sex                             |                         |           |                          |           |                               |           |                 |
| Women                           | 5                       | 4.8%      | 1                        | 1.6%      | 4                             | 10.0%     | 0.137           |
| Men                             | 99                      | 95.2%     | 63                       | 98.4%     | 36                            | 90.0%     |                 |
| Education                       |                         |           |                          |           |                               |           |                 |
| Primary                         | 54                      | 51.9%     | 36                       | 56.3%     | 18                            | 45.0%     | 0.319           |
| Secondary                       | 40                      | 38.5%     | 21                       | 32.8%     | 19                            | 47.5%     |                 |
| University                      | 10                      | 9.6%      | 7                        | 10.9%     | 3                             | 7.5%      |                 |
| Civil status                    |                         |           |                          |           |                               |           |                 |
| Single                          | 51                      | 49.0%     | 32                       | 50.0%     | 19                            | 47.5%     | 0.969           |
| Married                         | 43                      | 41.3%     | 26                       | 40.6%     | 17                            | 42.5%     |                 |
| Divorced                        | 10                      | 9.6%      | 6                        | 9.4%      | 4                             | 10.0%     |                 |
| Employment                      |                         |           |                          |           |                               |           |                 |
| Unemployed                      | 38                      | 36.5%     | 16                       | 25.0%     | 22                            | 55.0%     | <b>0.002 *</b>  |
| Employed                        | 66                      | 63.5%     | 48                       | 75.0%     | 18                            | 45.0%     |                 |
| Social Index Mean-high to high  | 8                       | 7.7%      | 6                        | 9.4%      | 2                             | 5.0%      | 0.634           |
| Mean                            | 14                      | 13.5%     | 8                        | 12.5%     | 6                             | 15.0%     |                 |
| Mean-low                        | 38                      | 36.5%     | 21                       | 32.8%     | 17                            | 42.5%     |                 |
| Low                             | 44                      | 42.3%     | 29                       | 45.3%     | 15                            | 37.5%     |                 |
|                                 | <b>Mean</b>             | <b>SD</b> | <b>Mean</b>              | <b>SD</b> | <b>Mean</b>                   | <b>SD</b> | <b><i>p</i></b> |
| Chronological age (yrs-old)     | 40.24                   | 14.74     | 39.56                    | 14.17     | 41.33                         | 15.73     | 0.555           |
| Onset of the disorder (yrs-old) | 29.66                   | 11.69     | 28.99                    | 11.28     | 30.73                         | 12.38     | 0.464           |
| Duration of the disorder (yrs)  | 5.31                    | 5.81      | 5.02                     | 5.57      | 5.78                          | 6.21      | 0.519           |

Note. SD: standard deviation. \* Bold: significant comparison.

**Table S2.** Pre-post changes registered for the e-Estesia (experimental group, *n* = 40).

|                              | Pre-App     |           | Post-App    |           | <i>p</i>           | $\eta^2$                 |
|------------------------------|-------------|-----------|-------------|-----------|--------------------|--------------------------|
|                              | <i>Mean</i> | <i>SD</i> | <i>Mean</i> | <i>SD</i> |                    |                          |
| DERS Non-acceptance          | 11.88       | 5.27      | 11.28       | 5.29      | 0.462              | 0.014                    |
| DERS Goals                   | 11.00       | 4.07      | 10.03       | 4.04      | 0.137              | 0.056                    |
| DERS Impulse                 | 11.25       | 4.35      | 10.33       | 4.23      | 0.122              | 0.060                    |
| DERS Awareness               | 18.13       | 5.28      | 17.98       | 5.21      | 0.854              | 0.001                    |
| DERS Strategy                | 15.45       | 6.07      | 14.13       | 5.73      | 0.132              | 0.057                    |
| DERS Clarity                 | 10.30       | 3.39      | 9.55        | 3.68      | 0.167              | 0.048                    |
| DERS Total score             | 78.00       | 18.47     | 73.28       | 20.84     | 0.100              | 0.068                    |
| ERQ Suppression              | 3.94        | 1.35      | 3.36        | 1.42      | <b>0.021 *</b>     | <b>0.129<sup>+</sup></b> |
| ERQ Reappraisal              | 4.13        | 1.19      | 3.98        | 1.32      | 0.501              | 0.012                    |
| UPPS-P Lack premeditation    | 23.35       | 6.03      | 23.45       | 5.36      | 0.877              | 0.001                    |
| UPPS-P Lack perseverance     | 19.88       | 4.12      | 20.25       | 4.97      | 0.575              | 0.008                    |
| UPPS-P Sensation seeking     | 29.05       | 9.33      | 29.15       | 10.55     | 0.925              | 0.001                    |
| UPPS-P Positive urgency      | 29.08       | 9.39      | 29.05       | 11.05     | 0.983              | 0.001                    |
| UPPS-P Negative urgency      | 29.10       | 6.66      | 28.15       | 8.01      | 0.264              | 0.032                    |
| UPPS-P Total score           | 130.45      | 26.47     | 130.05      | 29.89     | 0.877              | 0.001                    |
| SCL-90R Somatization         | 0.62        | 0.73      | 0.44        | 0.70      | <b>0.005 *</b>     | <b>0.189<sup>+</sup></b> |
| SCL-90R Obsessive-compulsive | 0.68        | 0.67      | 0.41        | 0.57      | <b>&lt;0.001 *</b> | <b>0.468<sup>+</sup></b> |
| SCL-90R Sensitivity          | 0.69        | 0.77      | 0.46        | 0.71      | <b>0.006 *</b>     | <b>0.179<sup>+</sup></b> |

|                        |       |       |       |       |                    |                |
|------------------------|-------|-------|-------|-------|--------------------|----------------|
| SCL-90R Depression     | 0.99  | 0.89  | 0.60  | 0.81  | <b>&lt;0.001 *</b> | <b>0.301 †</b> |
| SCL-90R Anxiety        | 0.60  | 0.67  | 0.33  | 0.57  | <b>&lt;0.001 *</b> | <b>0.284 †</b> |
| SCL-90R Hostility      | 0.44  | 0.44  | 0.30  | 0.53  | <b>0.014 *</b>     | <b>0.144 †</b> |
| SCL-90R Phobic anxiety | 0.23  | 0.42  | 0.21  | 0.51  | 0.696              | 0.004          |
| SCL-90R Paranoia       | 0.51  | 0.55  | 0.34  | 0.53  | <b>0.027 *</b>     | <b>0.119 †</b> |
| SCL-90R Psychotic      | 0.52  | 0.59  | 0.36  | 0.69  | <b>0.005 *</b>     | <b>0.186 †</b> |
| SCL-90R GSI            | 0.65  | 0.59  | 0.43  | 0.60  | <b>&lt;0.001 *</b> | <b>0.355 †</b> |
| SCL-90R PST            | 34.63 | 21.72 | 22.78 | 23.22 | <b>&lt;0.001 *</b> | <b>0.403 †</b> |
| SCL-90R PSDI           | 1.49  | 0.62  | 1.19  | 0.67  | <b>0.004 *</b>     | <b>0.190 †</b> |

Note. SD: standard deviation. \* Bold: significant comparison. † Bold: effect size within the ranges moderate to large.

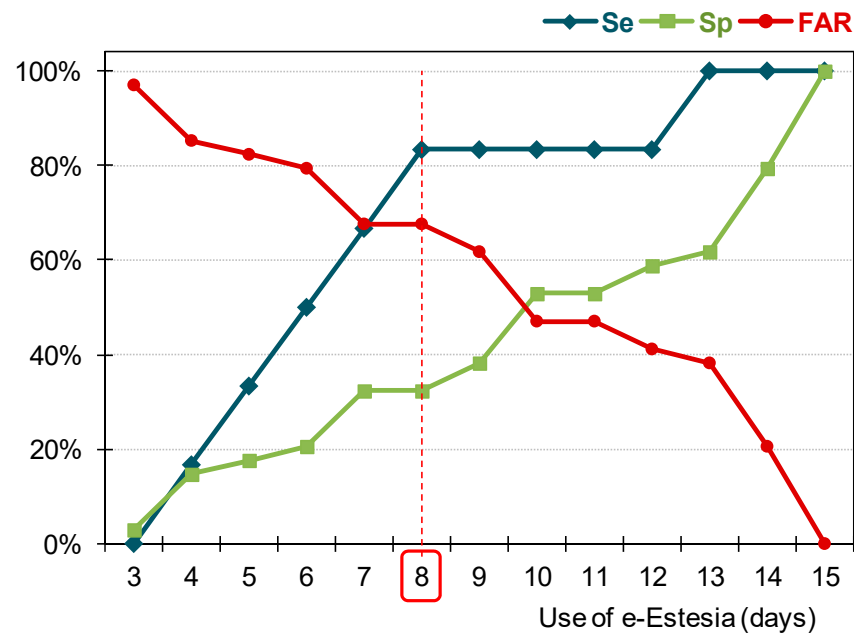

**Figure S1.** Capacity of the e-Estesia for identifying the risk of relapses (experimental group,  $n = 40$ ). Note. Se: sensibility. Sp: specificity. FAR: false alarm rate.

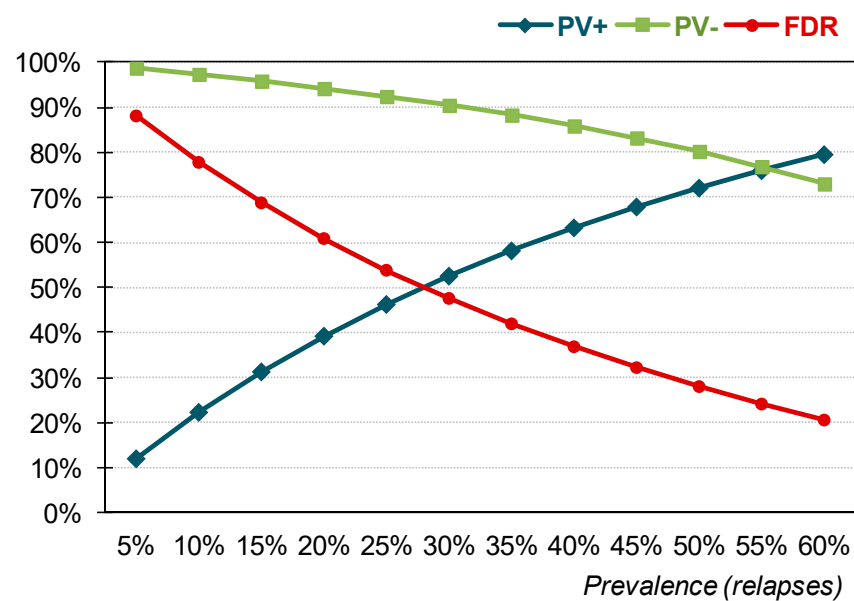

**Figure S2.** Predictive capacity for the cutoff 8-days use of the e-Estesia (experimental group,  $n = 40$ ). Note. PV+: predictive value for positive screening. PV-: predictive values for negative screening. FDR: false discovery rate.
